# Supplementary material for: Physical performance and chronic kidney disease development in elderly adults: results from a nationwide cohort study
Source: PubMed Central journal article supplement (PMC7521486; doi:10.18632/aging.103741), 2020-09-11
Supplement: aging-12-103741-s001..pdf [file aging-12-103741-s001..pdf]

## SUPPLEMENTARY TABLES

**Supplementary Table 1. Baseline characteristics according to one-leg stand test.**

|                                    | One-leg stand test tertile |                         |                         |                        |
|------------------------------------|----------------------------|-------------------------|-------------------------|------------------------|
|                                    | Overall<br>(n=30,871)      | Tertile 1<br>(n=10,476) | Tertile 2<br>(n=13,478) | Tertile 3<br>(n=6,917) |
| <b>OLS test score, s</b>           |                            |                         |                         |                        |
| Mean                               | 16.9 ± 10.4                | 7.1 ± 3.4               | 17.6 ± 2.3              | 30.4 ± 11.4            |
| Median (IQR)                       | 16 (10-20)                 | 7 (4-10)                | 18 (15-20)              | 28 (23-30)             |
| <b>Demographic data</b>            |                            |                         |                         |                        |
| Male sex                           | 15,070 (48.8)              | 4,170 (39.8)            | 6,894 (51.2)            | 4,006 (57.9)           |
| Body mass index, kg/m <sup>2</sup> | 24.2 ± 3.0                 | 24.5 ± 3.1              | 24.1 ± 2.9              | 23.9 ± 2.8             |
| SBP, mmHg                          | 130.1 ± 16.5               | 130.8 ± 16.8            | 129.7 ± 16.3            | 129.9 ± 16.2           |
| DBP, mmHg                          | 78.8 ± 10.2                | 79.1 ± 10.3             | 78.7 ± 10.1             | 78.8 ± 10.2            |
| <b>Smoking status</b>              |                            |                         |                         |                        |
| Non-smoker                         | 18,818 (61.0)              | 7,046 (67.3)            | 7,974 (62.2)            | 3,798 (54.9)           |
| Ex-smoker                          | 5,946 (19.3)               | 1,654 (15.8)            | 2,718 (20.2)            | 1,574 (22.8)           |
| Current smoker                     | 6,107 (19.8)               | 1,776 (17.0)            | 2,786 (20.7)            | 1,545 (22.3)           |
| Drinker                            | 13,533 (43.8)              | 4,078 (38.9)            | 6,120 (45.4)            | 3,335 (48.2)           |
| <b>Comorbidities</b>               |                            |                         |                         |                        |
| Diabetes mellitus                  | 6,951 (22.5)               | 2,637 (25.2)            | 2,821 (20.9)            | 1,493 (21.6)           |
| Hypertension                       | 15,602 (50.5)              | 5,545 (52.9)            | 6,653 (49.4)            | 3,404 (49.2)           |
| Arrhythmia                         | 2,067 (6.7)                | 725 (6.9)               | 883 (6.6)               | 459 (6.6)              |
| CVD                                | 5,276 (17.1)               | 2,046 (19.5)            | 2,165 (16.1)            | 1,065 (15.4)           |
| Myocardial infarction              | 602 (2.0)                  | 220 (2.1)               | 263 (2.0)               | 119 (1.7)              |
| Congestive heart failure           | 1,934 (6.3)                | 770 (7.4)               | 776 (5.8)               | 388 (5.6)              |
| Peripheral arterial disease        | 1,086 (3.5)                | 356 (3.4)               | 475 (3.7)               | 255 (3.7)              |
| Dementia                           | 460 (1.5)                  | 174 (1.7)               | 190 (1.4)               | 96 (1.4)               |
| Malignancy                         | 1,937 (6.3)                | 653 (6.2)               | 850 (6.3)               | 434 (6.3)              |
| <b>Laboratory parameters</b>       |                            |                         |                         |                        |
| eGFR, mL/min/1.73m <sup>2</sup>    | 84.9 ± 19.2                | 85.5 ± 19.9             | 84.1 ± 18.2             | 85.5 ± 20.0            |
| Glucose, mg/dL                     | 101.3 ± 25.2               | 101.9 ± 26.2            | 101.2 ± 25.0            | 100.6 ± 24.2           |
| Total cholesterol, mg/dL           | 198.3 ± 37.8               | 200.1 ± 38.3            | 197.7 ± 37.8            | 199.8 ± 38.9           |
| HDL-C, mg/dL                       | 52 [44-61]                 | 52[44-61]               | 52 [44-60]              | 51 [43-61]             |
| Triglyceride, mg/dL                | 118 [85-168]               | 121 [87-172]            | 117 [83-165]            | 116 [84-166]           |

Note: All variables are expressed as mean and standard deviation, number and percentage, or median and 25th and 75th percentiles

Cardiovascular disease (CVD) was defined as the presence of a history of myocardial infarction, coronary artery disease, congestive heart failure, peripheral artery disease, or cerebrovascular disease.

Abbreviations: OLS, one-leg stand; BMI, body mass index; SBP, systolic blood pressure; DBP, diastolic blood pressure; CVD, cardiovascular disease; eGFR, estimated glomerular filtration rate; HDL-C, high-density lipoprotein cholesterol

**Supplementary Table 2. Cause of death according to physical performance groups.**

| Cause of death, n (%)       | Overall    | Tertile 1  | Tertile 2  | Tertile 3  | <i>P</i> |
|-----------------------------|------------|------------|------------|------------|----------|
| <b>Timed up and go test</b> |            |            |            |            | .8       |
| Malignancy                  | 446 (49.3) | 223 (51.5) | 133 (48.5) | 90 (45.7)  |          |
| Cardiovascular disease      | 153 (16.9) | 77 (17.8)  | 45 (16.4)  | 31 (15.7)  |          |
| Unintentional injury        | 137 (15.2) | 59 (13.6)  | 44 (16.1)  | 34 (17.3)  |          |
| Respiratory disease         | 52 (5.8)   | 22 (5.1)   | 16 (5.8)   | 14 (7.1)   |          |
| Gastroenteric disease       | 26 (2.9)   | 11 (2.5)   | 9 (3.3)    | 6 (3.0)    |          |
| Endocrinologic disease      | 21 (2.3)   | 9 (2.1)    | 6 (2.2)    | 6 (3.0)    |          |
| Infective disease           | 13 (1.4)   | 5 (1.2)    | 7 (2.6)    | 1 (0.5)    |          |
| Kidney disease              | 4 (0.4)    | 3 (0.7)    | 0 (0.0)    | 1 (0.5)    |          |
| Etc                         | 52 (5.8)   | 24 (5.5)   | 14 (5.1)   | 14 (7.1)   |          |
| <b>One leg stand test</b>   |            |            |            |            | .2       |
| Malignancy                  | 446 (49.3) | 146 (42.2) | 196 (55.2) | 104 (51.2) |          |
| Cardiovascular disease      | 153 (16.9) | 62 (17.9)  | 58 (16.3)  | 33 (16.3)  |          |
| Unintentional injury        | 137 (15.2) | 62 (17.9)  | 44 (12.4)  | 31 (15.3)  |          |
| Respiratory disease         | 52 (5.8)   | 21 (6.1)   | 17 (4.8)   | 14 (6.9)   |          |
| Gastroenteric disease       | 26 (2.9)   | 12 (3.5)   | 9 (2.5)    | 5 (2.5)    |          |
| Endocrinologic disease      | 21 (2.3)   | 9 (2.6)    | 8 (2.3)    | 4 (2.0)    |          |
| Infective disease           | 13 (1.4)   | 5 (1.4)    | 7 (2.0)    | 1 (0.5)    |          |
| Kidney disease              | 4 (0.4)    | 1 (0.3)    | 1 (0.3)    | 2 (1.0)    |          |
| Etc                         | 52 (5.8)   | 28 (8.1)   | 15 (4.2)   | 9 (4.4)    |          |

**Supplementary Table 3. Outcome event rates according to one-leg stand test tertile groups.**

|                                      | Overall          | One leg stand test |                  |                  | <i>P</i> <sup>a</sup> |
|--------------------------------------|------------------|--------------------|------------------|------------------|-----------------------|
|                                      |                  | Tertile 1          | Tertile 2        | Tertile 3        |                       |
| <b>N</b>                             | 30,871           | 10,476             | 13,478           | 6,917            |                       |
| <b>Person-years</b>                  | 181,647          | 60,299             | 80,501           | 40,847           |                       |
| <b>Incident CKD</b>                  |                  |                    |                  |                  |                       |
| Events, n                            | 2,142            | 767                | 896              | 479              |                       |
| Incidence rate per 1000 person-years | 11.8 (11.3-12.3) | 12.7 (11.9-13.7)   | 11.1 (10.4-11.9) | 11.7 (10.7-12.8) | .05                   |
| <b>Death</b>                         |                  |                    |                  |                  |                       |
| Events, n                            | 905              | 346                | 355              | 204              |                       |
| Incidence rate per 1000 person-years | 5.0 (4.7-5.3)    | 5.7 (5.2-6.4)      | 4.4 (4.0-4.9)    | 5.0 (4.4-5.7)    | .002                  |

Note: <sup>a</sup>Log rank test

Abbreviations: CKD, chronic kidney disease

**Supplementary Table 4. Hazard ratios for incident chronic kidney disease according to one-leg stand test.**

|                                    | Model 1          |     | Model 2          |     | Model 3          |     |
|------------------------------------|------------------|-----|------------------|-----|------------------|-----|
|                                    | HR (95% CI)      | P   | HR (95% CI)      | P   | HR (95% CI)      | P   |
| <b>Cause-specific model</b>        |                  |     |                  |     |                  |     |
| <b>OLS score, per s</b>            | 0.94 (0.88-0.99) | .02 | 0.97 (0.92-1.03) | .36 | 0.99 (0.93-1.04) | .62 |
| <b>OLS score tertile</b>           |                  |     |                  |     |                  |     |
| 1                                  | Ref              |     | Ref              |     | Ref              |     |
| 2                                  | 0.91 (0.83-1.00) | .06 | 0.98 (0.89-1.08) | .67 | 0.98 (0.89-1.08) | .66 |
| 3                                  | 0.89 (0.80-1.00) | .05 | 0.96 (0.86-1.08) | .52 | 0.97 (0.86-1.09) | .59 |
| <b>Fine-Gray model<sup>a</sup></b> |                  |     |                  |     |                  |     |
| <b>OLS score, per s</b>            | 0.95 (0.89-1.01) | .11 | 0.99 (0.93-1.06) | .73 | 0.99 (0.94-1.07) | .9  |
| <b>OLS score tertile</b>           |                  |     |                  |     |                  |     |
| 1                                  | Ref              |     | Ref              |     | Ref              |     |
| 2                                  | 0.93 (0.83-1.03) | .9  | 1.00 (0.90-1.15) | .9  | 1.00 (0.89-1.11) | .9  |
| 3                                  | 0.91 (0.83-1.03) | .9  | 0.98 (0.86-1.12) | .9  | 0.99 (0.87-1.12) | .9  |

Note: OLS score and high-density lipoprotein cholesterol were log-transformed due to skewed distribution.

<sup>a</sup>In Fine-Gray model, mortality was considered as a competing risk.

Model 1: adjusted for sex and estimated glomerular filtration rate.

Model 2: adjusted for model 2 plus body mass index, systolic blood pressure, chronic obstructive pulmonary disease history, dementia history, diabetes mellitus history, and cardiovascular disease history.

Model 3: adjusted for model 3 plus smoking habit, alcohol consumption, and high-density lipoprotein cholesterol.

Abbreviations: OLS, one-leg stand; HR, hazard ratio; CI, confidence interval; Ref, reference.

**Supplementary Table 5. Cause-specific hazard ratios for incident chronic kidney disease according to physical performance test after excluding subjects with comorbidities<sup>a</sup>.**

|             | Model 1          |       | Model 2          |       | Model 3          |       |
|-------------|------------------|-------|------------------|-------|------------------|-------|
|             | HR (95% CI)      | P     | HR (95% CI)      | P     | HR (95% CI)      | P     |
| TUG score   |                  |       |                  |       |                  |       |
| Time, per s | 1.48 (1.26-1.73) | <.001 | 1.46 (1.24-1.71) | <.001 | 1.43 (1.21-1.68) | <.001 |
| OLS score   |                  |       |                  |       |                  |       |
| Time, per s | 0.92 (0.86-0.99) | .03   | 0.95 (0.88-1.03) | .21   | 0.97 (0.90-1.04) | .40   |

Note: TUG and OLS test score, and high-density lipoprotein cholesterol were log-transformed due to skewed distribution.

<sup>a</sup>Comorbidities included chronic obstructive pulmonary disease, dementia, and cardiovascular disease.

Model 1: adjusted for sex and estimated glomerular filtration rate.

Model 2: adjusted for Model 2 plus body mass index, systolic blood pressure, and diabetes mellitus history.

Model 3: adjusted for Model 3 plus smoking habit, alcohol consumption, and high-density lipoprotein cholesterol.

Abbreviations: TUG; timed up and go, OLS; one-leg stand; HR, hazard ratio; CI, confidence interval

**Supplementary Table 6. Hazard ratios for incident chronic kidney disease according to timed up and go test after excluding subjects who have reached outcome within 2 years of the physical performance test.**

|                                    | Model 1          |       | Model 2          |      | Model 3          |     |
|------------------------------------|------------------|-------|------------------|------|------------------|-----|
|                                    | HR (95% CI)      | P     | HR (95% CI)      | P    | HR (95% CI)      | P   |
| <b>Cause-specific model</b>        |                  |       |                  |      |                  |     |
| <b>TUG score, per s</b>            | 1.30 (1.13-1.50) | <.001 | 1.25 (1.08-1.44) | .002 | 1.21 (1.05-1.40) | .01 |
| <b>TUG score tertile</b>           |                  |       |                  |      |                  |     |
| 1                                  | Ref              |       | Ref              |      | Ref              |     |
| 2                                  | 1.09 (0.97-1.22) | .13   | 1.08 (0.97-1.21) | .16  | 1.09 (0.97-1.22) | .16 |
| 3                                  | 1.25 (1.10-1.42) | .001  | 1.19 (1.05-1.36) | .008 | 1.17 (1.03-1.34) | .02 |
| <b>Fine-Gray model<sup>a</sup></b> |                  |       |                  |      |                  |     |
| <b>TUG score, per s</b>            | 1.28 (1.10-1.49) | .002  | 1.23 (1.05-1.43) | .009 | 1.21 (1.03-1.41) | .02 |
| <b>TUG score tertile</b>           |                  |       |                  |      |                  |     |
| 1                                  | Ref              |       | Ref              |      | Ref              |     |
| 2                                  | 1.11 (0.98-1.25) | .10   | 1.10 (0.97-1.24) | .12  | 1.11 (0.99-1.25) | .08 |
| 3                                  | 1.23 (1.07-1.41) | .004  | 1.17 (1.02-1.35) | .03  | 1.16 (1.01-1.34) | .04 |

Note: TUG score and high-density lipoprotein cholesterol were log-transformed due to skewed distribution.

<sup>a</sup>In Fine-Gray model, mortality was considered as a competing risk.

Model 1: adjusted for sex and estimated glomerular filtration rate.

Model 2: adjusted for model 2 plus body mass index, systolic blood pressure, chronic obstructive pulmonary disease history, dementia history, diabetes mellitus history, and cardiovascular disease history.

Model 3: adjusted for model 3 plus smoking habit, alcohol consumption, and high-density lipoprotein cholesterol.

Abbreviations: TUG, 3-m timed up and go; HR, hazard ratio; CI, confidence interval, Ref, reference.

**Supplementary Table 7. Hazard ratios for incident chronic kidney disease according to one-leg stand test after excluding subjects who have reached outcome within 2 years of the physical performance test.**

|                                    | Model 1          |     | Model 2          |     | Model 3          |     |
|------------------------------------|------------------|-----|------------------|-----|------------------|-----|
|                                    | HR (95% CI)      | P   | HR (95% CI)      | P   | HR (95% CI)      | P   |
| <b>Cause-specific model</b>        |                  |     |                  |     |                  |     |
| <b>OLS score, per s</b>            | 0.92 (0.86-0.98) | .02 | 0.96 (0.90-1.03) | .24 | 0.97 (0.90-1.03) | .31 |
| <b>OLS score tertile</b>           |                  |     |                  |     |                  |     |
| 1                                  | Ref              |     | Ref              |     | Ref              |     |
| 2                                  | 0.90 (0.81-1.01) | .08 | 0.96 (0.86-1.07) | .45 | 0.96 (0.86-1.08) | .51 |
| 3                                  | 0.86 (0.75-0.99) | .03 | 0.92 (0.80-1.05) | .24 | 0.93 (0.81-1.07) | .30 |
| <b>Fine-Gray model<sup>a</sup></b> |                  |     |                  |     |                  |     |
| <b>OLS score, per s</b>            | 0.94 (0.87-1.01) | .08 | 0.98 (0.90-1.05) | .55 | 0.98 (0.91-1.06) | .9  |
| <b>OLS score tertile</b>           |                  |     |                  |     |                  |     |
| 1                                  | Ref              |     | Ref              |     | Ref              |     |
| 2                                  | 0.92 (0.82-1.04) | .20 | 0.98 (0.87-1.10) | .72 | 0.99 (0.87-1.11) | .8  |
| 3                                  | 0.87 (0.75-1.01) | .07 | 0.93 (0.80-1.08) | .35 | 0.94 (0.81-1.09) | .44 |

Note: OLS score and high-density lipoprotein cholesterol were log-transformed due to skewed distribution.

<sup>a</sup>In Fine-Gray model, mortality was considered as a competing risk.

Model 1: adjusted for sex and estimated glomerular filtration rate.

Model 2: adjusted for model 2 plus body mass index, systolic blood pressure, chronic obstructive pulmonary disease history, dementia history, diabetes mellitus history, and cardiovascular disease history.

Model 3: adjusted for model 3 plus smoking habit, alcohol consumption, and high-density lipoprotein cholesterol.

Abbreviations: OLS, one-leg stand; HR, hazard ratio; CI, confidence interval, Ref, reference.

**Supplementary Table 8. ICD-10 codes used for comorbidity detection.**

| <b>Comorbidities</b>                     | <b>Definitions</b>                                                                                                                                                                                                        | <b>ICD-10 Codes or Procedure codes</b>                                                                                        |
|------------------------------------------|---------------------------------------------------------------------------------------------------------------------------------------------------------------------------------------------------------------------------|-------------------------------------------------------------------------------------------------------------------------------|
| Myocardial infarction<br>Hypertension    | Defined from diagnosis*<br>Composite of following:<br>>140/90 mmHg at baseline<br>examination<br>one or more ICD codes (I10-13 or<br>I14) with antihypertensive<br>two or more ICD codes prior to<br>baseline examination | ICD-10: I21, I22, I25.2<br>ICD-10: I10, I11, I12, I13, I15 plus all<br>kinds of oral antihypertensive                         |
| Diabetes mellitus                        | Defined from diagnosis* plus<br>treatment                                                                                                                                                                                 | ICD-10: E10, E11, E12, E13, E14<br>Treatment: all kinds of oral antidiabetics<br>and insulin                                  |
| Peripheral arterial disease              | Defined from diagnosis*                                                                                                                                                                                                   | ICD-10: I70, I71                                                                                                              |
| Congestive heart failure                 | Defined from diagnosis*                                                                                                                                                                                                   | ICD-10: I11.0, I50, I97.1                                                                                                     |
| Malignancy                               | Defined from diagnosis*                                                                                                                                                                                                   | ICD-10: C00-C97                                                                                                               |
| Chronic obstructive pulmonary<br>disease | Defined from diagnosis* plus<br>treatment                                                                                                                                                                                 | ICD-10: J42, J43(except J43.0), J44<br>Treatment: SABA, SAMA, LABA,<br>LAMA, ICS, ICS+LABA, or<br>methylxanthine (>1 months). |
| Dementia                                 | Defined from diagnosis*                                                                                                                                                                                                   | ICD-10: F00, F03, G30, G31                                                                                                    |
| History of renal replacement<br>therapy  | Defined from hemodialysis or<br>peritoneal dialysis, claim code or<br>operation of kidney transplantation                                                                                                                 | Korean procedure codes: O7010, O7020,<br>O7061, O7062, O9991                                                                  |

Note: \* To ensure accuracy, comorbidities were established based on one inpatient or two outpatient records of ICD-10 codes in the database

Abbreviations: ICD-10, 10th revision of the International Statistical Classification of Diseases and Related Health Problems; SABA, Short acting beta agonists; SAMA, short acting muscarinic antagonist; LAMA, long acting muscarinic antagonist; LABA, long acting beta agonists; ICS, Inhaled corticosteroids.
